# Supplementary material for: Soil microbial community and physicochemical properties together drive soil organic carbon in Cunninghamia lanceolata plantations of different stand ages
Source: PeerJ. 2022 Aug 22;10:e13873. doi: 10.7717/peerj.13873 (PMC9406796; doi:10.7717/peerj.13873)
Supplement: Supplemental Information 1 [file peerj-10-13873-s001.xlsx]

## Sheet: PLFA
	PLFA
	nmol g-1														nmol g-1
	plot	15:0	i15:0	a15:0	i16:0	16:1 w7c	17:0	i17:0	cy17:0	cy19:0	18:2 w6c	18:1 w9c	10Me 16:0	10Me 18:0	TPLFA	B	F	ACT	G+	G-	F/B	G+/G-
young	plot1	0	1.13006	0.470373	0.819563	0.476579	0	0.666344	0.288894	1.17378	0.378863	0.952876	0	0.325658	6.68299	5.02559	1.33174	0.325658	3.08634	1.93925	0.264991	1.59151
young	plot2	0	2.55785	1.67347	1.12628	1.05461	0.145694	0.676821	0.415955	1.32218	0.266793	1.01051	0	0.617853	10.868	8.97286	1.2773	0.617853	6.03442	2.79274	0.142351	2.16075
young	plot3	0	1.25582	0.609548	0.868725	0.727312	0	0.679131	0.267946	0.88349	0.756426	1.02187	0	0.272735	7.343	5.29198	1.77829	0.272735	3.41323	1.87875	0.336036	1.81676
middle-aged	plot4	0.525296	4.37886	2.64484	2.18742	1.55085	0.314189	1.34736	0.731202	4.75789	0.523939	2.09055	3.10751	1.28446	25.4444	18.4379	2.61449	4.39197	10.5585	7.03994	0.1418	1.4998
middle-aged	plot5	0.609953	5.7209	3.32641	2.59474	2.51009	0.403389	1.73289	1.06573	6.75216	0.968163	3.47334	4.2252	1.73534	35.1183	24.7163	4.44151	5.96054	13.3749	10.328	0.1797	1.29502
middle-aged	plot6	0.591278	5.72993	3.54861	2.17413	2.31692	0.382555	1.47062	0.965276	4.41025	0.84104	2.64467	3.73473	1.30728	30.1173	21.5896	3.48571	5.04201	12.9233	7.69245	0.161453	1.68
mature	plot7	0	1.90682	1.00265	1.30477	0.634237	0.141716	0.736641	0.286426	1.98624	0.364924	1.22283	1.23491	0.766793	11.589	7.9995	1.58775	2.0017	4.95088	2.9069	0.198481	1.70315
mature	plot8	0.575774	2.24683	1.11594	1.49006	0.597909	0	0.962913	0.328463	2.63996	0.389354	1.25016	0	0.795939	12.3933	9.95784	1.63952	0.795939	5.81574	3.56633	0.164646	1.63074
mature	plot9	0	2.08434	1.42419	1.31474	0.64421	0.130083	0.860201	0.347793	2.61364	0.307997	1.27543	0	0.895852	11.8985	9.4192	1.58343	0.895852	5.68347	3.60565	0.168106	1.57627
	Soil properties
	plot	pH	SWC	BD	DOC	NH4	NO3	SOC	TN	C/N	SC	SA	POM
			%	g cm-3	mg kg-1	mg kg-1	mg kg-1	g kg-1	g kg-1		%	%	%
young	plot1	4.92	20.2494	0.803363	11.955	12.3	0.95	4.9	0.5	10.0737	42.675	26.9	18.3
young	plot2	4.81	20.4967	1.22262	29.925	14.1	0.55	6.6	0.6	11.5223	32.325	33.7	14.7333
young	plot3	4.9	21.7419	1.19562	11.125	10.7	0.55	4.5	0.7	6.4616	19.8	26.9667	39.1333
middle-aged	plot4	4.95	21.0633	1.23302	9.175	19.3	2.05	10.7	1.1	9.488	27.375	43.9667	19.3667
middle-aged	plot5	5.23	22.7749	1.32617	19.08	14.25	1.7	9.4	1	9.4817	15.95	42.6	30.4
middle-aged	plot6	5.11	23.6718	1.33055	15.965	12.25	0.9	11.8	1.1	10.9212	22.95	34.7667	27.3333
mature	plot7	4.7	20.3012	1.40769	4.15	24.5	1.55	9.9	0.8	11.9281	26.1	29.3333	23.5
mature	plot8	4.75	18.9355	1.29213	7.59	20.25	1.8	6.4	0.6	10.7271	10.2	25.9667	37.3333
mature	plot9	4.55	19.9811	1.28	7.59	21.65	0.85	7.2	0.6	11.3647	12.9	28.0667	39.9
